# Supplementary material for: Deep-red to near-infrared luminescence from Eu2+-trapped exciton states in YSiO2N
Source: Royal Society of Chemistry journal article supplement (doi:10.1039/d1cp05242j), 2022-01-01
Supplement: d1cp05242j1.pdf [file d1cp05242j1.pdf]

## Electronic Supplementary Information

# Deep-red to near-infrared luminescence from $\text{Eu}^{2+}$ - trapped exciton states in $\text{YSiO}_2\text{N}$

*Yuuki Kitagawa,<sup>a\*</sup> Jumpei Ueda,<sup>a</sup> Jian Xu,<sup>b</sup> Takayuki Nakanishi,<sup>c</sup> Takashi Takeda,<sup>c</sup> Naoto Hirosaki,<sup>c</sup> Setsuhisa Tanabe<sup>a</sup>*

<sup>a</sup> Department of Interdisciplinary Environment, Graduate School of Human and Environmental Studies, Kyoto University, Kyoto 606-8501, Japan

<sup>b</sup> International Center for Young Scientists (ICYS), National Institute for Materials Science (NIMS), Tsukuba, Ibaraki 305-0044, Japan

<sup>c</sup> Luminescent Materials Group, National Institute for Materials Science (NIMS), Tsukuba, Ibaraki 305-0044, Japan

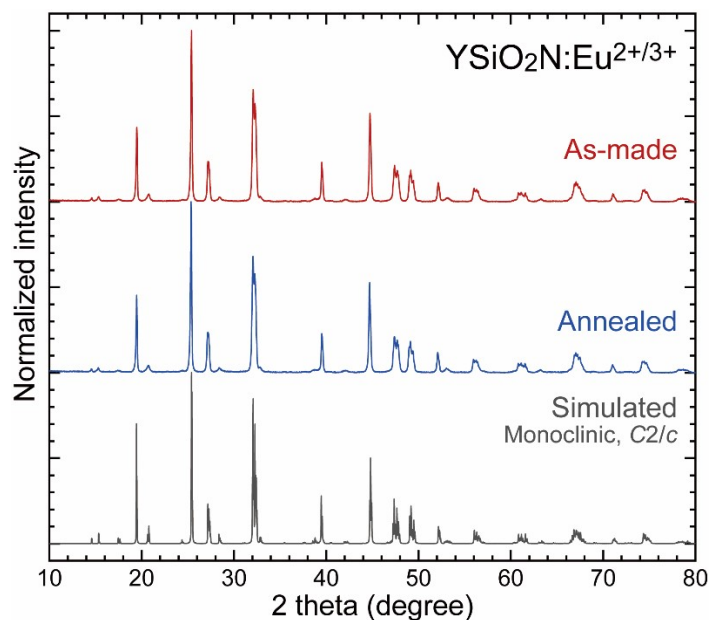

**Fig. S1** XRD patterns of the as-made and annealed  $\text{YSiO}_2\text{N:Eu}^{2+/3+}$  sample with the reference data of monoclinic  $\text{YSiO}_2\text{N}$  (space group:  $C2/c$ ).

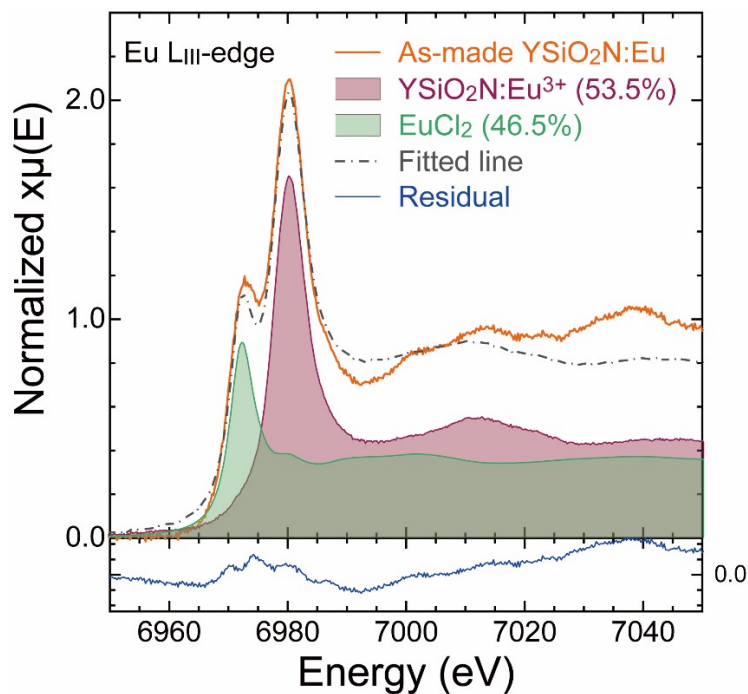

**Fig. S2** XANES spectra of the as-made sample, fitted with the spectra of the annealed  $\text{YSiO}_2\text{N:Eu}^{3+}$  sample and  $\text{EuCl}_2$  chemical to estimate the ratio between  $\text{Eu}^{2+}$  and  $\text{Eu}^{3+}$  ions.

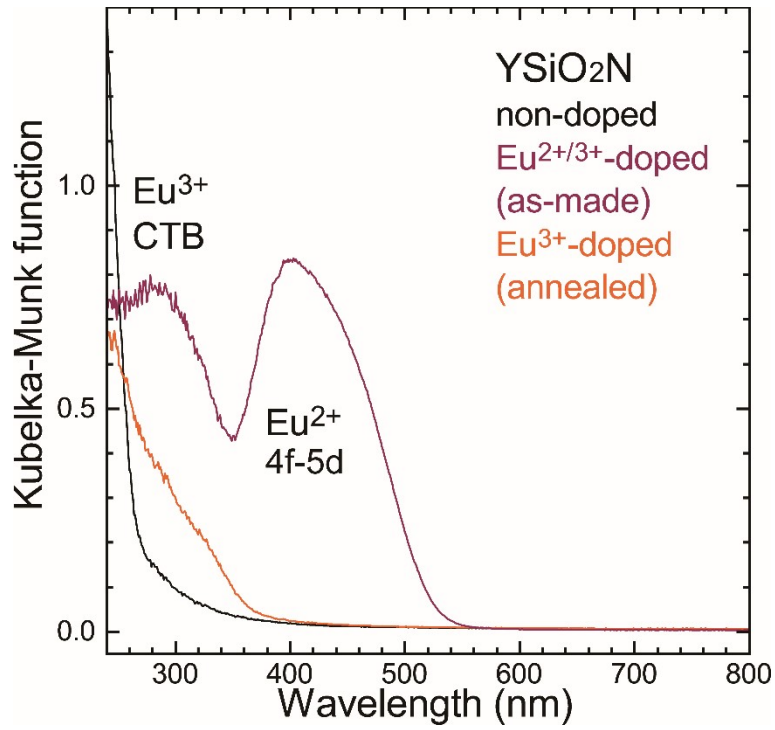

**Fig. S3** Diffuse reflectance spectra of the non-doped YSiO<sub>2</sub>N, as-made YSiO<sub>2</sub>N:Eu<sup>2+/3+</sup>, and annealed YSiO<sub>2</sub>N:Eu<sup>3+</sup> samples. The vertical axis is converted to the Kubelka-Munk function.

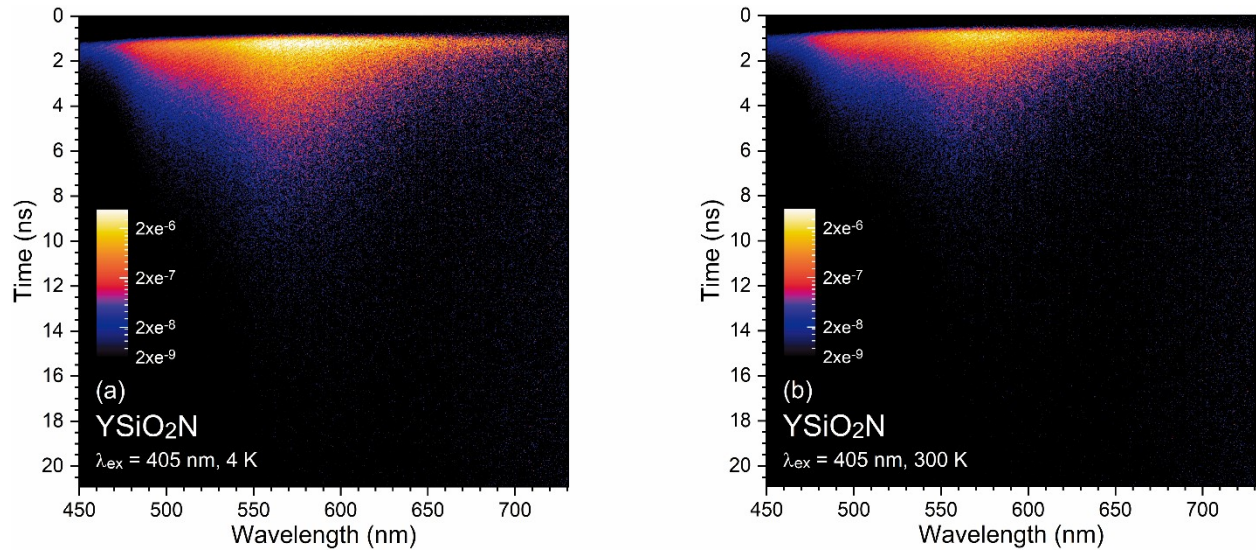

**Fig. S4** Time-resolved PL spectra of the non-doped YSiO<sub>2</sub>N sample at 4 and 300 K.

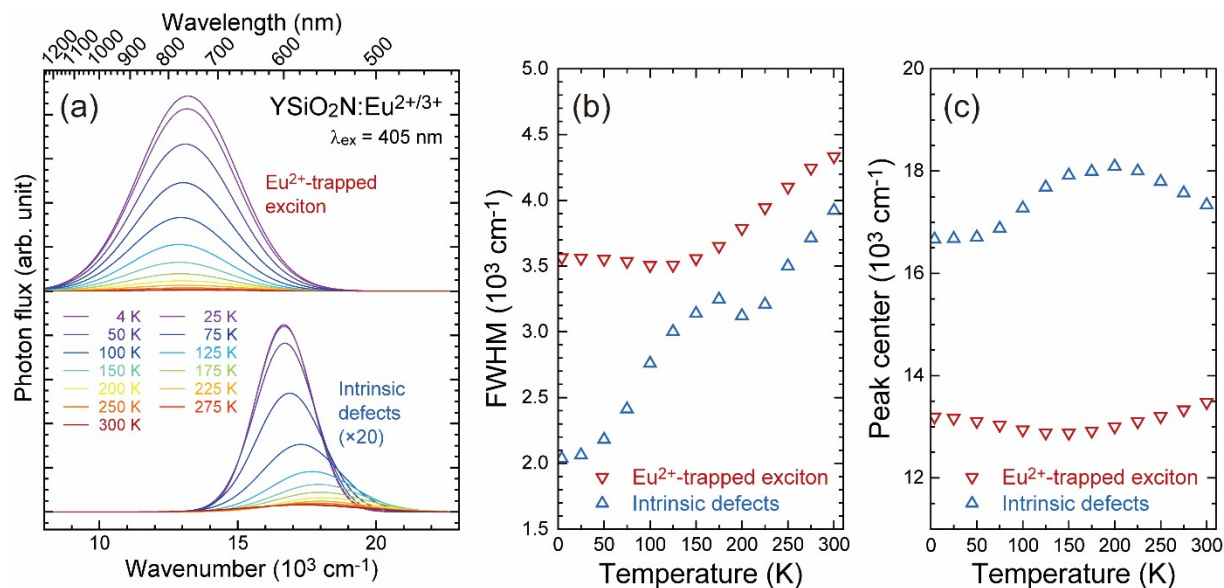

**Fig. S5** (a) Gaussian profiles obtained by fitting of the PL spectra at low temperatures ( $T = 4\text{--}300$  K). (b–c) Fitting outputs of FWHM and peak center for the Gaussian profiles of  $\text{Eu}^{2+}$ -trapped exciton and intrinsic defects emission.

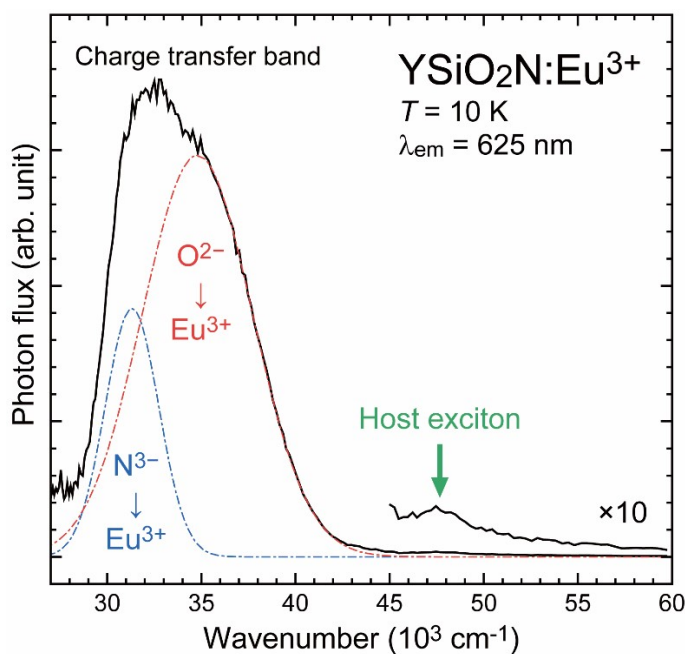

**Fig. S6** PLE spectrum of the annealed  $\text{YSiO}_2\text{N}:\text{Eu}^{3+}$  sample at 10 K. The broad excitation band was deconvoluted into two Gaussian profiles, assigned to the CT transition from  $\text{N}^{3-}$  and  $\text{O}^{2-}$  to  $\text{Eu}^{3+}$  ions.
